# Supplementary material for: Fish oil extracted from Coregonus peled improves obese phenotype and changes gut microbiota in a high-fat diet-induced mouse model of recurrent obesity
Source: Royal Society of Chemistry journal article supplement (doi:10.1039/d0fo00911c), 2020-01-01
Supplement: d0fo00911c1.pdf [file d0fo00911c1.pdf]

### Supplementary data

**Table S1 Fatty acid compositions (%) of the fish oil from *Coregonus peled***

| Fatty acid            | Peak area (%) |
|-----------------------|---------------|
| 14:0                  | 8.57          |
| 14:1,n-5              | 1.23          |
| 15:0                  | 3.25          |
| 16:0                  | 14.63         |
| 16:1,n-7              | 18.47         |
| 16:2,n-4,7            | 3.25          |
| 16:3,n-4,7,10         | 0.93          |
| 17:1,n-7              | 0.81          |
| 18:0                  | 2.31          |
| 18:1,n-7              | 0.43          |
| 18:1,n-9              | 20.48         |
| 18:1,n-10             | 5.31          |
| 18:2,n-6,9            | 2.34          |
| 18:4,n-3,6,9,12       | 1.99          |
| 20:1,n-9              | 0.64          |
| 20:4,n-3,6,9,12       | 0.61          |
| 20:4,n-6,9,12,15      | 0.66          |
| 20:5,n-3,6,9,12,15    | 8.11          |
| 22:5,n-3,6,9,12,15    | 1.23          |
| 22:6,n-3,6,9,12,15,18 | 4.75          |
| SFA                   | 28.76         |
| UFA                   | 71.34         |
| EPA+DHA               | 12.86         |

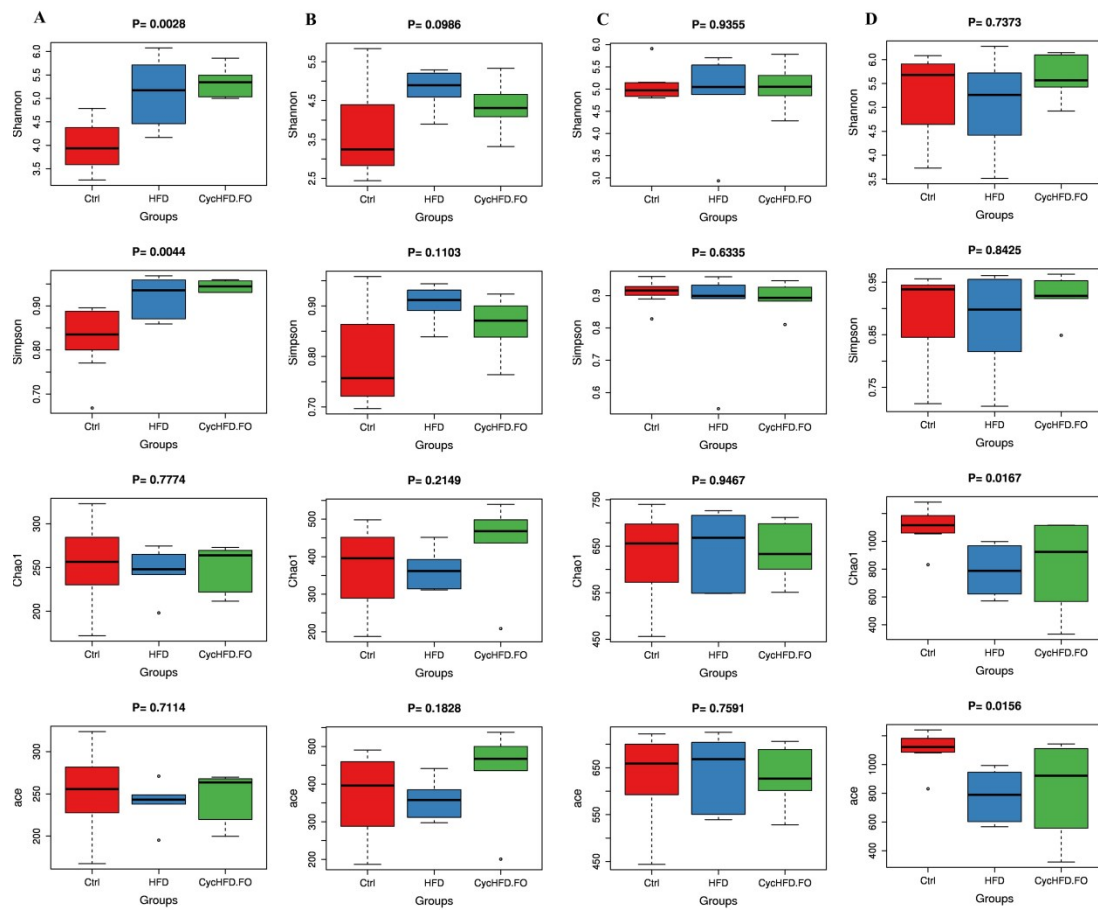

Fig. S1 Comparison of  $\alpha$ -diversity of gut microbiota during obesity (A), after obesity (B), during second obesity (C), and after second obesity (D).

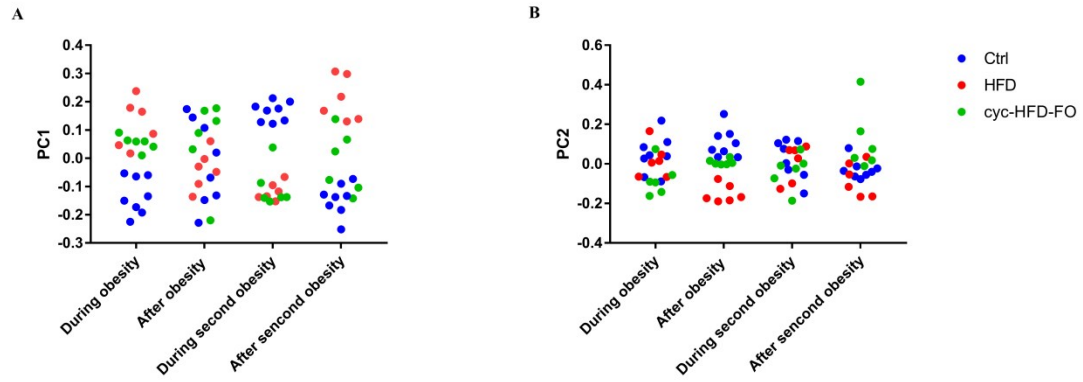

Fig. S2 Principal coordinate analyses (PCoA) of unweighted UniFrac distances of microbiota composition during obesity, after obesity, during second obesity, and after second obesity.

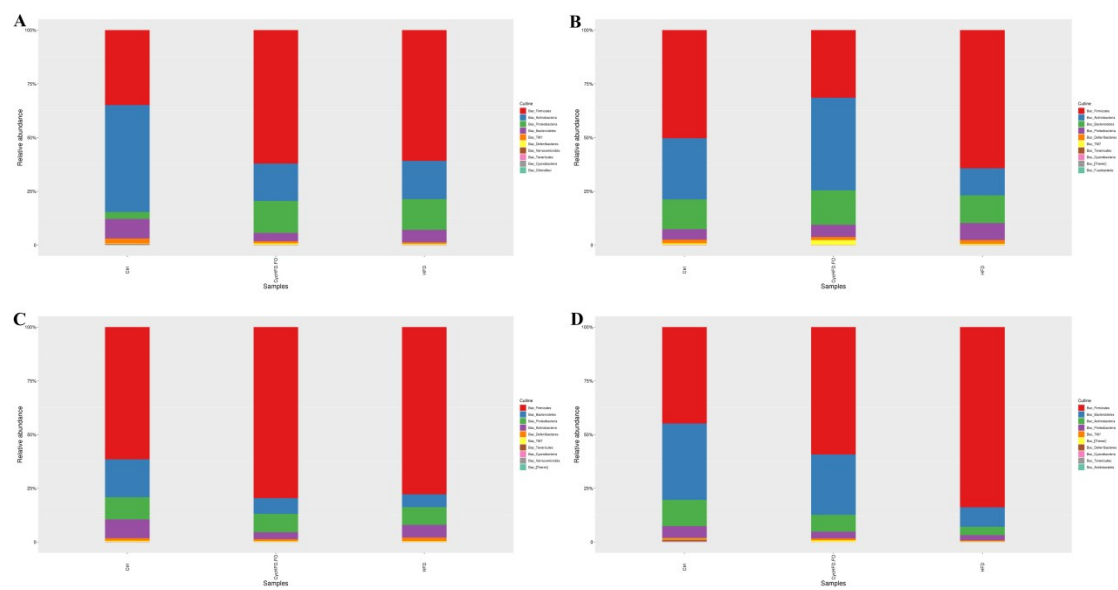

Fig. S3 Comparison of phylum taxonomic level during obesity (A), after obesity (B), during second obesity (C), and after second obesity (D).



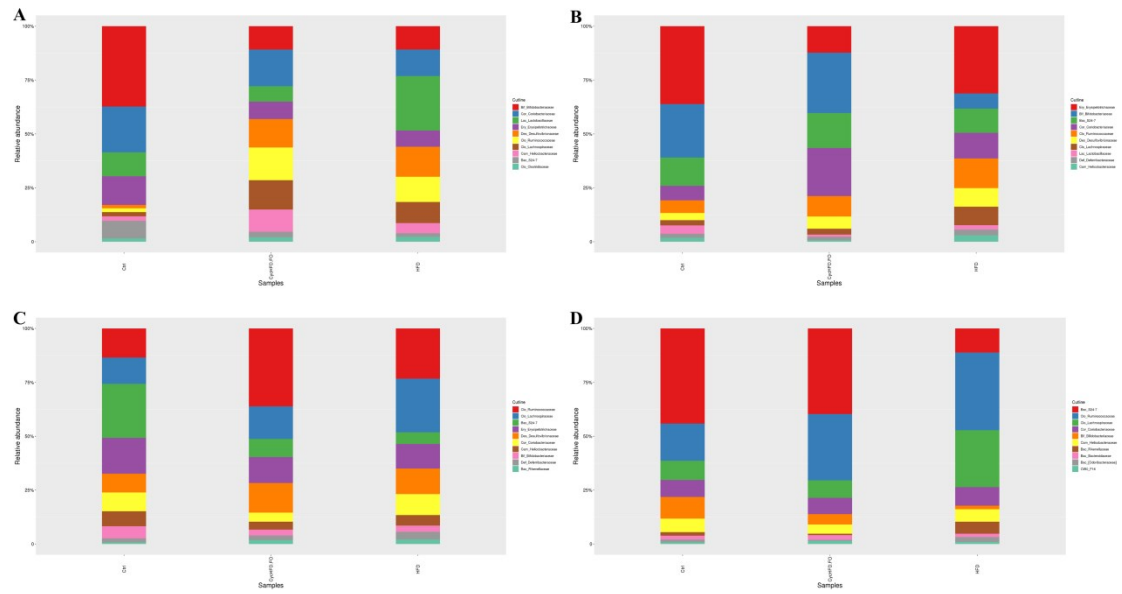

Fig. S5 Comparison of families taxonomic level during obesity (A), after obesity (B), during second obesity (C), and after second obesity (D).

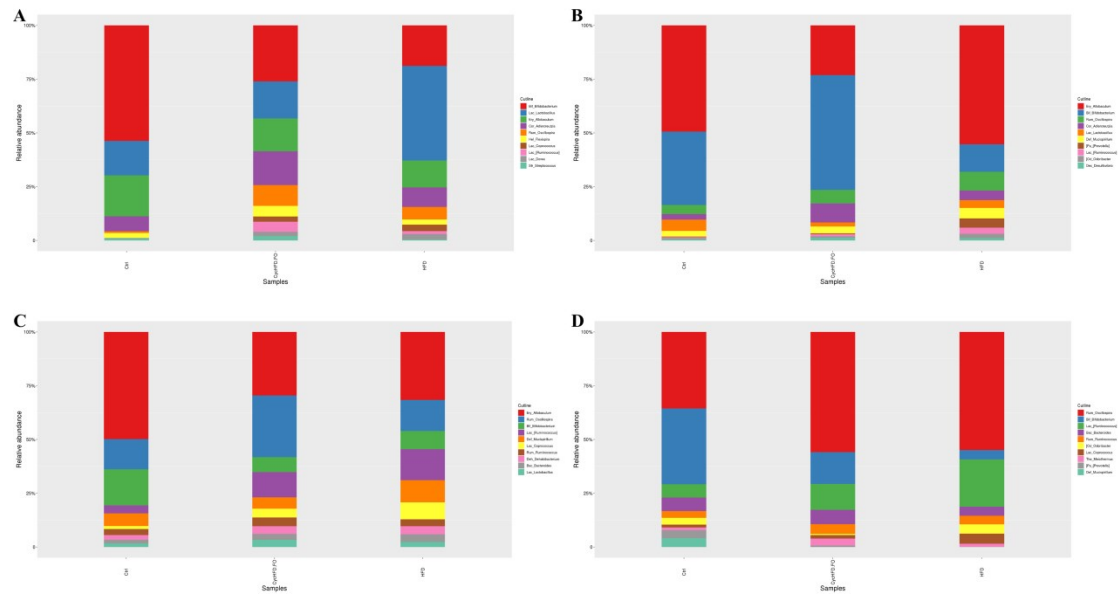

Fig. S6 Comparison of genus taxonomic level during obesity (A), after obesity (B), during second obesity (C), and after second obesity (D).
